# Supplementary material for: Clinical improvement and reduction in serum calprotectin levels after an intensive exercise programme for patients with ankylosing spondylitis and non-radiographic axial spondyloarthritis
Source: PubMed Central journal article supplement (PMC5124318; doi:10.1186/s13075-016-1180-1), 2016-11-25
Supplement: 13075_2016_1180_MOESM1_ESM.pdf [file 13075_2016_1180_MOESM1_ESM.pdf]

Additional File 1

**Demographic and Clinical Characteristics of axSpA patients without exercise therapy  
and comparison to axSpA patients with exercise intervention**

|                                                           | All (n=29)       | AS (n=14)      | nr-axSpA (n=15) | Comparison<br>between AS<br>and nr-xSpA | Comparison between Exercise<br>group and Group without<br>intervention*                                     |
|-----------------------------------------------------------|------------------|----------------|-----------------|-----------------------------------------|-------------------------------------------------------------------------------------------------------------|
| Age                                                       | 34.83±1.68       | 36.36±2.82     | 33.40±1.93      | ns                                      | ns <sup>1</sup> , ns <sup>2</sup> , ns <sup>3</sup>                                                         |
| Gender (% of Female)                                      | 31.0             | 21.4           | 40.0            | ns                                      | ns <sup>1</sup> , ns <sup>2</sup> , ns <sup>3</sup>                                                         |
| BMI visit 1                                               | 25.25±0.87       | 25.01±1.06     | 25.47±1.41      | ns                                      | ns <sup>1</sup> , ns <sup>2</sup> , ns <sup>3</sup>                                                         |
| Disease duration since<br>First symptoms (years)          | 10.26±1.88       | 12.69±3.36     | 7.99±1.76       | ns                                      | ns <sup>1</sup> , ns <sup>2</sup> , ns <sup>3</sup>                                                         |
| Disease duration since<br>Diagnosis (years)               | 3.31±0.80        | 3.93±1.20      | 2.73±1.09       | ns                                      | ns <sup>1</sup> , ns <sup>2</sup> , ns <sup>3</sup>                                                         |
| HLA B27 positivity (%)                                    | 96.5             | 100            | 93.3            | ns                                      | ns <sup>1</sup> , ns <sup>2</sup> , ns <sup>3</sup>                                                         |
| History of<br>uveitis/exacerbation<br>(%) **              | 37.9 / 10.34     | 35.7 / 14.3    | 40.0 / 6.7      | ns                                      | all ns <sup>1</sup> , ns <sup>2</sup> , ns <sup>3</sup>                                                     |
| History of peripheral<br>arthritis/exacerbation<br>(%) ** | 24.1 / 0         | 7.2 / 0        | 40.0 / 0        | ns                                      | ns <sup>1</sup> /ns <sup>1</sup> , p <sup>2</sup> =0.014/ns <sup>2</sup> , ns <sup>3</sup> /ns <sup>3</sup> |
| Hip involvement (%)                                       | 24.1             | 21.4           | 26.7            | ns                                      | ns <sup>1</sup> , ns <sup>2</sup> , ns <sup>3</sup>                                                         |
| Therapy - NSA (daily<br>use/on demand) (%)                | 96.5 (17.8/82.2) | 93 (15.4/84.6) | 100 (20/80)     | ns                                      | all ns <sup>1</sup> , ns <sup>2</sup> , ns <sup>3</sup>                                                     |
| Therapy - Sulfasalazin<br>(%)                             | 44.8             | 14.3           | 53.3            | ns                                      | p <sup>1</sup> =0.013, ns <sup>2</sup> , ns <sup>3</sup>                                                    |

|                               |                       |                       |                       |    |                                                         |
|-------------------------------|-----------------------|-----------------------|-----------------------|----|---------------------------------------------------------|
| Therapy - Biologicals (%) *** | 6.9%                  | 14.3                  | 0                     | ns | ns <sup>1</sup> , ns <sup>2</sup> , ns <sup>3</sup>     |
| Smokers ever/current (%)      | 37.9 / 37.9           | 50.0 / 50.0           | 26.6 / 26.6           | ns | all ns <sup>1</sup> , ns <sup>2</sup> , ns <sup>3</sup> |
| BASDAI visit 1 / visit 2      | 2.18±0.36 / 2.46±0.41 | 1.79±0.37 / 1.91±0.50 | 2.55±0.61 / 2.98±0.63 | ns | all ns <sup>1</sup> , ns <sup>2</sup> , ns <sup>3</sup> |
| BASFI visit 1 / visit 2       | 1.56±0.32 / 1.39±0.31 | 1.25±0.41 / 1.20±0.37 | 1.85±0.48 / 1.57±0.49 | ns | all ns <sup>1</sup> , ns <sup>2</sup> , ns <sup>3</sup> |
| ASDAS-CRP visit 1 / visit 2   | 1.87±0.23 / 1.82±0.24 | 1.89±0.28 / 1.76±0.30 | 1.84±0.36 / 1.87±0.37 | ns | all ns <sup>1</sup> , ns <sup>2</sup> , ns <sup>3</sup> |
| CRP visit 1/ visit 2 (mg/l)   | 7.72±1.47 / 7.39±2.56 | 8.66±2.00 / 5.90±1.62 | 6.84±2.17 / 8.78±4.14 | ns | all ns <sup>1</sup> , ns <sup>2</sup> , ns <sup>3</sup> |

**Abbreviations:** axSpA- axial spondyloarthritis, AS- ankylosing spondylitis, nr-axSpA - nonradiographic axial spondyloarthritis, BMI - body mass index, NSA - non-steroidal antirheumatic drugs, BASDAI - Bath AS activity index, BASFI - Bath AS functional index, CRP - C reactive protein, ASDAS-CRP - AS disease activity score, TNFi - tumor necrosis factor alpha inhibitors

\*All parameters were compared between all axSpA (1), AS (2) and nr-axSpA (3) in exercise group and group without intervention. Data for Exercise group see Table 1 and 2. All data are at baseline, only exacerbation and visit 2 after 6 months.

\*\*Exacerbations of uveitis/arthritis occurring during 6 months of follow up

\*\*\* Only TNFi was used in long-term therapy for high disease activity.

Statistical analysis: The intergroup P value was calculated using either Mann-Whitney test or chi-squared/Fisher's exact test. Data are characterised as mean ± standard deviation.
