# Supplementary material for: Clinical improvement and reduction in serum calprotectin levels after an intensive exercise programme for patients with ankylosing spondylitis and non-radiographic axial spondyloarthritis
Source: PubMed Central journal article supplement (PMC5124318; doi:10.1186/s13075-016-1180-1), 2016-11-25
Supplement: 13075_2016_1180_MOESM2_ESM.pdf [file 13075_2016_1180_MOESM2_ESM.pdf]

**The dependence of the change of calprotectin levels on the changes  
of clinical and laboratory parameters**

|                                                 | <b>Regression<br/>coefficient</b> | <b>SE</b> | <b>Beta</b> | <b>t</b> | <b>p</b> |
|-------------------------------------------------|-----------------------------------|-----------|-------------|----------|----------|
| (Constant)                                      | -1146.372                         | 1224.032  |             | -0.937   | 0.353    |
| <b>ΔCRP</b>                                     | 67.998                            | 21.898    | 0.437       | 3.105    | 0.003    |
| <b>ΔASDAS</b>                                   | 178.950                           | 309.360   | 0.104       | 0.578    | ns       |
| <b>ΔBASDAI</b>                                  | -79.945                           | 138.255   | -0.099      | -0.578   | ns       |
| <b>ΔBASFI</b>                                   | 127.673                           | 186.582   | 0.101       | 0.684    | ns       |
| <b>BMI baseline</b>                             | -4.341                            | 39.475    | -0.013      | -0.110   | ns       |
| <b>axSpA with<br/>exercise/without exercise</b> | 449.824                           | 289.927   | 0.192       | 1.552    | ns       |
| <b>nr-axSpA/AS</b>                              | 176.002                           | 279.870   | 0.075       | 0.629    | ns       |

**Abbreviations:** axSpA - axial spondyloarthritis, nr-axSpA - non radiographic axial spondyloarthritis, AS - ankylosing spondylitis, ASDAS-CRP - AS disease activity score, CRP - C-reactive protein, BASDAI- Bath AS disease activity index, Δ changes of the scores/biomarker values, SE -standard error, Beta - value of standardised coefficients, t- regression coefficients/SE ratio, ns - not significant, p - p value (statistical significance)

Statistical analysis: Regression model of dependent variable Δ calprotectin to independent variables Δ CRP, ΔASDAS-CRP, ΔBASDAI or ΔBASFI and BMI, axSpA without and with exercise intervention and nr-axSpA and AS. Explanatory value is  $r^2=30\%$ . Significance was determined if  $p<0.05$
